# Supplementary material for: Factors influencing depression in community-dwelling elderly patients with osteoarthritis of the knee in China: a cross-sectional study
Source: Research Square preprint supplement (doi:10.21203/rs.3.rs-1302426/v1), 2022-02-14
Supplement: Supplementary file 1 [file 20e136b987a1126d932c38ad.xlsx]

## Sheet: Sheet1
Number	Age (y)	Age group	Sex	Height	Body weight	BMI	BMI group	Ethnic group	Marital status	Residence	Education level	Occupation before retirement	Monthly Income (yuan)	Medical expense	Disease duration (y)	Number of diseased knees	Frequency of fall in past year	Using walking aids	Number of comorbidities	Take pain relievers or cartilage protectors	WOMAC-pain	Pain group	WOMAC-stiffness	Stiffness group	WOMAC-Physical function	Physical function group	AIMS2-society	Society group	TUG	TUG group	SCT	SCT group	1	2	3	4	5	6	7	8	9	10	11	12	13	14	15	GDS
1	82	3	1	168	62	21.9671	2	1	1	1	4	2	4	2	2	1	0	1	1	0	8	2	2	1	29	2	19	3	12.56	2	7.31	1	0	1	0	0	0	0	0	1	1	1	0	0	0	0	1	5
2	77	2	2	166	48	17.4191	1	1	1	1	3	2	4	2	18	2	0	1	1	0	9	2	2	1	23	1	17	3	12.11	2	8.77	1	0	1	0	0	0	0	0	0	1	1	0	0	0	1	0	4
3	65	1	2	161	61	23.533	2	1	1	1	1	1	1	2	1.5	2	0	1	1	0	12	2	2	1	29	2	14	2	10.95	2	7.07	1	0	1	0	0	0	0	0	0	0	1	1	0	0	0	0	3
4	63	1	2	167	56	20.0796	2	1	1	1	4	2	5	1	2	2	1	1	1	0	8	2	1	1	29	2	16	3	11.19	2	7.71	1	0	0	0	0	0	1	0	0	0	0	1	0	0	0	0	2
5	76	2	2	154	67	28.251	4	1	1	1	1	2	3	1	4	1	0	1	2	1	12	2	3	1	40	2	12	2	12.07	2	8.05	1	0	1	0	0	0	1	0	1	1	1	0	0	0	0	1	6
6	80	3	1	175	76	24.8163	3	1	1	1	1	1	3	1	5	2	0	1	1	1	18	3	6	2	43	2	13	2	15.83	3	13.37	2	0	1	1	0	1	0	1	1	1	1	1	0	1	0	1	10
7	84	3	2	156	65	26.7094	3	1	2	1	2	2	4	1	21	2	1	2	1	1	16	3	4	2	41	2	11	2	27.63	5	26.98	5	0	1	1	0	1	1	1	1	1	0	1	1	0	0	0	9
8	68	1	2	160	65	25.3906	3	1	1	1	4	2	4	2	9	2	0	1	2	0	12	2	4	2	36	2	14	2	14.47	2	10.97	2	1	1	0	1	1	1	1	0	1	1	0	0	0	0	1	9
9	64	1	2	162	62	23.6244	2	1	1	1	4	2	5	1	6.5	2	0	1	1	0	2	1	2	1	9	1	19	3	9.17	1	6.57	1	0	0	0	0	0	0	0	0	0	0	0	0	0	0	0	0
10	70	2	2	157	61	24.7475	3	1	1	1	4	2	4	1	1.5	2	0	1	2	0	2	1	0	0	9	1	17	3	11.09	2	7.85	1	0	0	0	0	0	0	0	0	0	0	0	0	0	1	0	1
11	61	1	2	158	70	28.0404	4	1	2	1	2	1	2	2	0.5	1	0	1	1	1	9	2	3	1	33	2	15	2	13.66	2	9.12	1	1	1	1	1	1	0	1	1	1	1	1	0	1	1	0	12
12	66	1	1	172	68	22.9854	2	1	1	1	4	2	1	2	0.5	2	0	1	1	0	7	1	0	0	16	1	15	2	11.78	2	7.27	1	0	0	0	0	0	0	0	0	0	0	0	0	0	0	0	0
13	72	2	2	156	65	26.7094	3	1	1	1	4	2	4	2	33	2	0	1	2	0	5	1	1	1	5	1	17	3	13.97	2	10.91	2	1	0	0	0	1	0	1	1	0	0	1	0	0	0	0	5
14	60	1	2	157	65	26.3702	3	1	1	1	4	2	3	2	35	2	0	1	3	0	11	2	5	2	41	2	19	3	10.47	2	8.01	1	1	1	0	0	1	0	1	0	1	1	1	0	0	0	0	7
15	79	2	2	162	70	26.6728	3	1	1	1	3	1	3	2	3.5	2	0	1	2	1	10	2	4	2	16	1	13	2	15.98	3	14.01	2	0	1	1	0	0	0	0	0	1	1	0	0	0	0	0	4
16	76	2	1	165	76	27.9155	3	1	1	1	4	2	4	2	0.5	1	0	1	3	0	3	1	0	0	7	1	13	2	14.07	2	8.07	1	0	1	0	0	0	0	0	0	0	1	0	0	0	0	0	2
17	78	2	2	161	43	16.5889	1	1	2	1	4	2	4	2	8	2	1	1	3	1	8	2	5	2	21	1	14	2	12.44	2	9.9	1	0	1	1	0	1	0	0	1	1	0	1	0	0	1	0	7
18	62	1	2	161	45	17.3604	1	1	1	1	4	2	2	2	0.5	1	0	1	0	0	3	1	0	0	10	1	18	3	12.11	2	7.15	1	0	1	0	0	0	0	0	0	0	0	0	0	0	0	0	1
19	60	1	2	157	55	22.3133	2	1	1	1	4	2	2	2	0.5	1	0	1	0	0	4	1	0	0	8	1	15	2	12.81	2	7.7	1	0	1	0	0	0	0	0	0	0	0	0	0	0	0	0	1
20	81	3	2	163	61	22.9591	2	1	2	1	1	2	2	2	2	1	1	1	2	0	13	2	3	1	51	3	15	2	15.68	3	12.78	2	0	0	0	0	0	1	0	0	1	1	0	1	0	0	1	5
21	77	2	2	152	55	23.8054	2	1	1	1	4	2	3	1	49	2	2	1	3	0	9	2	2	1	23	1	20	3	17.25	3	12.03	2	0	1	0	0	1	1	0	0	0	1	0	0	0	1	0	5
22	84	3	1	170	72	24.9135	3	1	2	1	4	2	3	2	2.5	2	0	1	3	0	13	2	1	1	30	2	15	2	11.09	2	8.59	1	0	1	0	0	1	1	0	1	0	1	1	0	1	1	1	9
23	81	3	2	155	60.5	25.1821	3	1	2	1	3	2	3	2	2.5	2	0	1	1	1	8	2	2	1	42	2	16	3	25.3	5	16.17	3	0	1	1	0	1	1	0	1	0	0	0	0	0	1	0	6
24	86	3	1	176	73	23.5666	2	1	2	1	4	2	3	1	1	2	1	1	3	0	7	1	3	1	21	1	16	3	15.65	3	9.3	1	0	1	0	0	1	1	1	1	0	0	1	1	0	0	0	7
25	85	3	2	160	60	23.4375	2	1	1	1	3	2	5	1	8	2	1	2	1	0	12	2	4	2	37	2	12	2	19.33	3	14.29	2	0	1	1	0	0	1	0	1	1	1	0	0	0	0	0	6
26	78	2	1	172	81	27.3797	3	1	1	1	3	2	4	2	1.5	2	1	1	1	0	11	2	3	1	44	2	17	3	15.87	3	11.77	2	0	1	0	1	0	0	0	1	1	1	0	0	0	0	1	6
27	72	2	2	154	58	24.4561	3	1	1	1	4	2	5	2	0.5	2	0	1	2	0	5	1	2	1	28	2	17	3	12.74	2	10.69	2	0	1	0	0	0	0	0	1	0	1	0	0	0	0	0	3
28	78	2	2	158	57	22.8329	2	1	1	1	3	2	5	2	1	1	1	1	2	1	8	2	1	1	13	1	15	2	14.01	2	11.05	2	1	1	1	1	1	0	1	0	0	1	1	1	0	0	0	9
29	75	2	2	155	65	27.0552	3	1	1	1	2	2	2	2	30	2	1	1	3	0	9	2	4	2	32	2	16	3	13.71	2	17.17	3	0	1	0	0	0	0	0	1	1	0	1	0	0	0	0	4
30	60	1	2	169	66	23.1084	2	1	2	1	2	2	2	2	2	2	0	1	0	0	4	1	3	1	21	1	15	2	13.56	2	10.27	2	0	0	0	0	0	0	0	0	0	0	0	0	0	1	1	2
31	70	2	1	167	66	23.6652	2	1	1	1	4	2	5	2	5.5	1	0	1	1	0	7	1	0	0	5	1	17	3	12.03	2	7.67	1	0	1	0	0	0	0	0	0	0	0	0	0	0	0	0	1
32	70	2	2	154	54	22.7694	2	2	1	1	4	2	5	2	2	1	0	1	1	0	9	2	2	1	22	1	18	3	12.72	2	8.5	1	0	0	0	0	0	1	0	0	0	0	0	0	0	0	0	1
33	73	2	2	160	65	25.3906	3	1	1	1	3	2	3	2	12.5	2	1	1	3	1	8	2	2	1	33	2	15	2	17.07	3	11.07	2	1	1	1	1	1	0	1	0	1	0	1	1	0	0	0	9
34	70	2	2	155	66	27.4714	3	1	1	1	3	2	3	2	14.5	1	0	1	3	0	3	1	0	0	14	1	17	3	13.17	2	11.09	2	0	1	0	0	0	0	0	0	0	0	0	0	1	1	1	4
35	74	2	2	160	61	23.8281	2	2	2	1	4	2	3	2	9	2	0	1	1	0	9	2	0	0	20	1	16	3	12.03	2	8.86	1	0	1	0	0	0	0	0	0	1	0	0	0	1	1	0	4
36	72	2	2	164	61	22.68	2	1	2	2	2	1	1	2	15	1	0	1	2	0	5	1	5	2	17	1	18	3	12.31	2	7.77	1	0	1	0	0	0	0	0	0	0	1	1	0	0	0	0	3
37	64	1	2	156	45	18.4911	1	1	1	2	1	1	1	2	0.5	1	0	1	0	0	4	1	0	0	6	1	15	2	13.09	2	8.31	1	0	1	0	0	0	0	0	0	0	0	0	0	0	0	0	1
38	65	1	2	154	55	23.1911	2	1	1	2	4	2	4	2	16.5	2	0	1	2	1	5	1	1	1	1	1	20	3	9.01	1	7.07	1	0	1	0	0	0	0	0	0	0	0	0	0	0	0	1	2
39	60	1	2	170	70	24.2215	3	1	1	2	3	1	1	2	2.5	1	2	1	1	1	7	1	0	0	6	1	18	3	9.5	1	9.17	1	0	1	0	0	0	0	0	0	0	1	0	0	0	0	0	2
40	60	1	2	160	67	26.1719	3	1	1	2	2	1	1	2	0.5	1	0	1	1	1	8	2	4	2	31	2	13	2	10.63	2	11.33	2	0	1	1	0	0	1	0	1	1	1	0	0	1	1	0	8
41	60	1	2	157	56	22.719	2	1	1	2	2	1	1	1	6.5	1	0	1	2	1	5	1	2	1	19	1	13	2	11.72	2	8.76	1	0	1	1	0	0	1	0	1	1	1	0	0	1	1	0	8
42	61	1	2	160	80	31.25	4	1	1	2	2	1	1	2	4	2	1	1	3	1	6	1	0	0	5	1	19	3	14.35	2	10.17	2	0	0	0	0	0	0	0	0	0	1	0	0	0	0	1	2
43	70	2	2	158	70	28.0404	4	1	1	2	1	1	2	2	4	2	0	1	2	1	7	1	2	1	13	1	17	3	11.94	2	7.81	1	0	0	0	0	0	0	0	0	0	1	0	0	0	0	1	2
44	67	1	2	159	70	27.6888	3	1	1	2	2	1	2	2	6.5	2	1	1	2	1	3	1	3	1	6	1	18	3	13.47	2	8.31	1	1	0	0	0	0	1	0	0	0	1	0	0	0	0	1	4
45	60	1	1	174	83	27.4145	3	1	1	2	1	1	2	1	0.5	2	0	1	3	1	6	1	4	2	17	1	15	2	12.56	2	11.78	2	0	0	1	1	0	1	0	0	1	1	0	0	1	0	0	6
46	64	1	2	160	71	27.7344	3	1	2	2	2	1	1	2	0.5	1	0	1	1	0	12	2	1	1	25	2	16	3	12.34	2	12.98	2	0	1	0	0	0	1	0	0	1	1	1	0	0	1	1	7
47	68	1	2	156	65	26.7094	3	1	1	2	2	1	2	2	16.5	1	1	1	1	0	7	1	0	0	3	1	18	3	9.77	1	8.74	1	1	0	0	0	1	0	0	1	0	1	0	1	0	0	1	6
48	68	1	2	155	75	31.2175	4	1	1	2	2	1	2	2	2.5	1	0	1	1	0	3	1	0	0	2	1	18	3	10.47	2	9.03	1	0	0	0	0	0	0	0	1	1	1	0	0	1	0	0	4
49	60	1	2	160	60	23.4375	2	1	1	2	2	1	2	2	0.5	1	0	1	1	0	3	1	0	0	3	1	20	3	10.53	2	9.67	1	0	0	0	0	0	0	0	0	0	1	1	0	0	0	0	2
50	65	1	2	155	60	24.974	3	1	1	2	2	1	1	2	4	2	0	1	2	1	8	2	1	1	25	2	20	3	13.07	2	8.11	1	0	0	0	0	0	0	1	1	1	1	0	0	1	1	0	6
51	60	1	2	158	43	17.2248	1	1	1	2	4	2	4	2	11.5	2	0	1	0	1	7	1	0	0	12	1	20	3	12.71	2	14.73	2	0	1	0	0	0	0	0	1	0	1	0	0	0	0	0	3
52	64	1	2	157	62	25.1532	3	1	1	2	1	1	1	2	0.5	2	0	1	1	1	6	1	6	2	20	1	20	3	14.1	2	9.28	1	0	0	0	0	0	0	0	0	0	1	1	0	0	0	0	2
53	60	1	2	150	50	22.2222	2	1	1	2	3	1	2	2	2.5	2	0	1	1	1	7	1	2	1	15	1	20	3	11.71	2	8.08	1	0	0	0	0	0	1	0	1	1	1	1	0	1	0	1	7
54	61	1	1	170	68	23.5294	2	1	1	2	3	1	2	2	1	2	0	1	1	1	6	1	4	2	28	2	20	3	12.28	2	8.35	1	0	0	1	0	0	1	0	0	1	1	0	0	0	0	0	4
55	61	1	2	150	70	31.1111	4	1	1	2	2	1	2	2	1	1	1	1	0	1	9	2	6	2	38	2	20	3	14.76	2	10.91	2	1	1	0	0	0	1	0	0	1	1	0	0	0	1	0	6
56	65	1	2	150	50	22.2222	2	1	1	2	4	2	4	2	25	2	0	1	0	0	4	1	0	0	10	1	19	3	11.41	2	7.24	1	0	1	1	1	0	0	0	0	1	0	0	0	0	0	0	4
57	77	2	2	155	70	29.1363	4	1	1	2	1	1	2	2	10	2	1	1	3	0	7	1	4	2	22	1	20	3	13.07	2	7.76	1	0	0	0	0	0	0	0	0	0	1	0	0	0	0	0	1
58	76	2	2	155	65	27.0552	3	1	1	2	1	1	1	2	9.5	2	1	1	3	1	11	2	2	1	44	2	18	3	21.08	4	12.21	2	0	1	0	0	0	0	0	1	0	1	0	0	0	1	0	4
59	76	2	2	162	60	22.8624	2	1	1	2	1	1	1	2	2.5	2	1	1	3	1	6	1	2	1	33	2	17	3	12.17	2	8.17	1	0	1	0	0	0	0	1	0	1	0	0	0	0	1	0	4
60	60	1	2	155	55	22.8928	2	1	1	2	1	1	1	2	11	2	0	1	1	0	5	1	3	1	34	2	16	3	12.42	2	10.78	2	0	0	0	0	0	0	0	0	1	1	0	0	0	0	0	2
61	64	1	1	170	90	31.1419	4	1	1	2	2	1	1	2	0.5	1	0	1	1	1	8	2	2	1	25	2	16	3	13.59	2	10.97	2	0	0	0	0	0	0	0	0	0	1	0	0	0	0	1	2
62	63	1	2	158	68	27.2392	3	1	1	2	2	1	1	2	0.5	1	0	1	1	1	2	1	0	0	10	1	12	2	10.41	2	8.76	1	0	0	0	0	0	0	0	0	0	1	1	0	0	0	0	2
63	62	1	2	140	62	31.6327	4	1	1	2	2	1	1	2	7	2	2	1	3	1	11	2	5	2	34	2	12	2	15.72	3	12.11	2	0	1	0	1	1	1	0	0	0	0	1	0	1	0	0	6
64	60	1	2	158	75	30.0433	4	1	1	2	3	1	1	2	1	2	0	1	0	1	11	2	4	2	37	2	12	2	10.87	2	7.35	1	0	0	0	0	0	0	0	0	0	1	0	0	0	0	0	1
65	62	1	2	155	65	27.0552	3	1	2	2	2	1	1	2	0.5	2	0	1	0	0	6	1	2	1	19	1	16	3	12.28	2	8.72	1	0	0	0	0	0	0	0	0	0	1	0	0	0	0	0	1
66	70	2	2	158	74	29.6427	4	1	1	2	2	1	2	2	0.5	1	0	1	0	0	3	1	0	0	15	1	11	2	12.44	2	7.09	1	0	1	0	0	0	0	0	0	1	1	0	0	0	1	0	4
67	71	2	2	154	53	22.3478	2	1	1	2	2	1	1	2	0.5	1	1	1	1	0	4	1	3	1	12	1	14	2	12.03	2	7.31	1	0	1	1	0	0	0	1	0	1	1	0	0	0	1	0	6
68	60	1	2	155	75	31.2175	4	1	1	2	2	1	2	2	1	1	0	1	1	0	7	1	2	1	23	1	17	3	11.81	2	8.63	1	0	0	0	0	1	1	0	0	1	0	0	0	1	0	0	4
69	70	2	2	150	63	28	4	1	1	2	2	1	2	2	2.5	1	0	1	1	0	7	1	2	1	9	1	20	3	13.81	2	8.28	1	0	0	1	0	0	0	0	0	0	1	0	0	0	0	0	2
70	60	1	2	158	55	22.0317	2	2	1	2	2	2	1	2	0.5	1	0	1	0	0	4	1	0	0	6	1	12	2	10.79	2	8.97	1	0	0	0	0	0	0	0	0	0	1	1	0	0	1	0	3
71	69	1	1	157	62	25.1532	3	1	1	2	2	1	1	2	7.5	2	0	1	1	1	7	1	3	1	12	1	20	3	14.34	2	7.79	1	0	0	0	0	0	0	0	0	0	0	1	0	0	0	0	1
72	73	2	2	155	70	29.1363	4	1	1	1	2	1	5	2	2	2	0	1	3	1	11	2	5	2	29	2	16	3	10.69	2	9.25	1	0	1	0	0	0	0	0	0	1	0	0	0	0	1	0	3
73	78	2	2	152	58	25.1039	3	1	1	1	3	1	5	2	18	2	0	1	1	1	15	3	0	0	29	2	20	3	11.19	2	10.11	2	0	1	0	1	0	1	0	0	0	1	0	0	1	0	1	6
74	67	1	2	165	71	26.079	3	1	1	1	2	1	2	2	2	1	0	1	1	1	2	1	0	0	18	1	20	3	13.52	2	9.29	1	0	0	0	0	0	1	0	0	1	0	0	0	0	0	0	2
75	77	2	1	178	72	22.7244	2	1	1	1	4	2	3	3	4	1	0	1	1	0	8	2	2	1	29	2	19	3	12.56	2	11.31	2	1	1	0	0	1	0	1	1	1	1	1	0	0	0	1	9
76	78	2	2	156	67	27.5312	3	1	1	1	3	2	3	3	5	1	0	1	1	0	9	2	2	1	23	1	17	3	12.11	2	10.77	2	1	1	0	0	1	0	1	0	1	1	1	0	0	1	0	8
77	75	2	2	160	65	25.3906	3	1	1	2	1	1	1	3	21	2	0	1	1	0	12	2	2	1	29	2	14	2	10.95	2	11.07	2	1	1	0	0	1	0	1	0	0	1	0	0	0	0	0	5
78	60	1	2	163	70	26.3465	3	1	1	1	4	2	5	2	9	2	0	1	0	0	5	1	1	1	20	1	6	1	10.09	2	9.85	1	0	1	0	0	0	0	0	0	1	0	0	0	0	0	0	2
79	76	2	1	168	48	17.0068	1	1	1	1	3	2	3	3	2	1	0	1	0	0	8	2	1	1	29	2	16	3	11.19	2	8.71	1	1	0	0	0	1	1	1	0	0	0	0	0	0	0	0	4
80	76	2	2	165	62	22.7732	2	1	1	1	3	2	4	2	6.5	2	0	1	3	0	12	2	3	1	40	2	12	2	12.07	2	10.05	2	1	1	0	0	1	1	1	1	1	1	1	0	0	0	1	10
81	69	1	2	155	80	33.2986	4	1	2	1	2	1	3	2	0.5	1	1	1	2	0	9	2	4	2	34	2	14	2	15.78	3	13.56	2	0	1	1	1	0	0	0	0	0	0	0	0	0	0	0	3
82	60	1	2	160	90	35.1562	4	1	1	2	2	1	3	2	33	1	0	1	1	0	13	2	4	2	37	2	17	3	16.13	3	13.97	2	0	0	0	1	0	1	0	0	1	0	0	0	1	0	0	4
83	75	2	2	160	65	25.3906	3	1	1	1	3	2	5	2	25	1	2	1	0	0	1	1	0	0	4	1	20	3	11.38	2	9.35	1	0	0	0	0	0	0	0	0	0	0	0	0	0	0	1	1
84	70	2	2	160	62	24.2187	3	2	2	1	4	2	4	2	8	1	1	1	1	0	2	1	0	0	5	1	20	3	7.69	1	7.62	1	0	0	0	0	0	0	0	0	0	0	0	0	0	0	0	0
85	77	2	1	185	75	21.9138	2	1	1	1	3	2	2	2	0.5	2	0	1	3	0	2	1	0	0	5	1	19	3	12.19	2	10.34	2	0	0	0	0	0	0	0	0	0	0	0	0	0	0	0	0
86	72	2	1	170	67.5	23.3564	2	2	1	1	3	1	2	2	38	2	2	1	0	0	5	1	2	1	12	1	11	2	14.16	2	10.01	2	0	1	0	0	0	1	0	0	0	0	0	0	0	0	1	3
87	76	2	2	168	64	22.6757	2	1	1	1	3	2	4	1	2.5	1	0	1	0	0	7	1	1	1	5	1	20	3	13.69	2	9.22	1	0	0	0	0	0	0	0	0	0	1	0	0	0	0	1	2
88	60	1	2	160	63	24.6094	3	1	1	1	4	2	5	1	9	1	0	1	1	1	1	1	0	0	8	1	19	3	10.96	2	8.59	1	0	1	0	0	0	0	0	0	1	0	0	0	0	0	0	2
89	75	2	2	157	58	23.5304	2	1	2	1	2	2	1	3	1	1	0	1	1	1	0	0	2	1	6	1	20	3	12.21	2	9.91	1	0	1	0	0	0	0	0	0	0	1	0	0	0	1	0	3
90	79	2	2	150	50	22.2222	2	1	1	1	3	1	5	2	1.5	2	0	1	3	0	3	1	4	2	16	1	14	2	15.1	3	12.6	2	0	1	1	1	1	0	0	1	0	1	0	1	0	0	0	7
91	76	2	1	176	74	23.8895	2	1	1	1	4	2	2	2	1	1	0	1	0	0	15	3	6	2	43	2	20	3	12.52	2	8.28	1	0	0	0	0	0	1	0	1	0	1	1	0	0	1	0	5
92	73	2	2	156	60	24.6548	3	1	2	1	3	2	3	2	10	1	0	1	0	1	8	2	5	2	42	2	18	3	16.22	3	10.12	2	0	1	1	0	0	0	0	1	0	0	1	0	0	0	1	5
93	77	2	2	162	62	23.6244	2	1	1	1	2	2	3	2	2	2	0	1	1	1	15	3	6	2	49	3	13	2	13.97	2	9.15	1	0	1	1	1	0	1	0	1	1	1	0	0	1	0	0	8
94	70	2	2	160	60	23.4375	2	1	1	1	4	2	5	1	2	1	0	1	1	0	2	1	0	0	16	1	20	3	11.94	2	10.67	2	0	0	0	0	1	0	0	0	1	0	0	0	0	0	0	2
95	77	2	1	171	76	25.9909	3	1	1	1	4	2	5	2	5	1	0	1	1	0	7	1	0	0	5	1	17	3	10.03	2	9.67	1	1	1	0	0	1	0	1	0	0	0	1	0	0	0	0	5
96	70	2	2	154	54	22.7694	2	2	1	1	4	2	5	2	2	1	0	1	1	0	9	2	2	1	22	1	18	3	12.2	2	9.5	1	1	0	0	0	1	1	1	0	0	0	1	0	0	0	0	5
97	77	2	2	160	65	25.3906	3	1	1	1	3	2	3	2	12	2	1	1	3	1	8	2	2	1	33	2	15	2	18.07	3	11.07	2	0	1	1	1	0	0	0	0	1	0	0	1	0	0	0	5
98	76	2	2	164	49	18.2183	1	1	2	1	4	2	5	2	6.5	2	0	1	2	1	5	1	2	1	13	1	17	3	10.37	2	9.33	1	1	0	0	0	0	0	1	0	0	0	1	0	0	0	0	3
99	70	2	2	160	61	23.8281	2	2	2	1	4	2	3	2	9	2	0	1	1	0	9	2	0	0	20	1	16	3	12.03	2	10.86	2	1	1	0	0	1	0	1	0	1	0	1	0	1	1	0	8
100	68	1	2	161	66	25.462	3	1	1	1	4	2	5	1	6.5	2	0	1	1	0	8	2	1	1	24	2	16	3	12.08	2	9.81	1	0	1	0	0	0	0	0	0	1	0	1	0	1	0	0	4
101	78	2	2	162	62	23.6244	2	1	2	1	2	2	2	2	0.5	1	0	1	1	1	2	1	0	0	9	1	17	3	10.09	2	9.85	1	0	0	0	0	0	0	0	0	0	0	0	0	0	1	0	1
102	60	1	2	165	65	23.8751	2	1	1	1	4	2	1	2	0.5	2	0	1	1	0	9	2	3	1	33	2	15	2	13.66	2	11.12	2	1	1	0	0	1	0	1	1	0	1	0	0	1	0	0	7
103	67	1	2	159	51	20.1733	2	1	1	1	4	2	4	2	7	2	0	1	2	0	7	1	0	0	16	1	15	2	11.78	2	9.27	1	0	0	0	0	0	0	0	0	0	0	0	0	0	0	0	0
104	61	1	2	167	65	23.3067	2	1	1	1	4	2	3	2	5	2	0	1	3	0	5	1	1	1	5	1	17	3	12.97	2	10.91	2	1	0	0	0	1	0	1	1	0	0	1	0	0	0	0	5
105	73	2	2	155	68	28.3039	4	1	1	1	3	2	3	2	3	2	0	1	2	1	11	2	5	2	41	2	19	3	10.47	2	9.01	1	1	1	0	0	1	0	0	0	1	0	1	0	0	0	0	5
106	69	1	2	158	63	25.2363	3	1	1	1	4	2	4	2	0.5	1	0	1	3	0	10	2	4	2	16	1	13	2	15.98	3	11.01	2	0	1	1	0	0	0	0	0	1	1	0	0	0	0	0	4
107	76	2	1	174	75	24.7721	3	1	2	1	4	2	4	2	8	2	1	1	3	1	3	1	0	0	9	1	13	2	14.07	2	10.07	2	0	1	0	0	0	0	0	0	0	1	0	0	0	0	0	2
108	81	3	1	168	55	19.487	2	1	1	2	2	1	2	2	15	1	0	1	0	0	3	1	0	0	10	1	18	3	10.11	2	8.15	1	0	1	0	0	0	0	0	0	0	0	0	0	0	0	0	1
109	60	1	2	153	60	25.6312	3	1	1	2	1	1	1	2	0.5	2	0	1	1	1	12	2	6	2	58	3	10	1	29.69	5	12.91	2	0	0	0	0	0	0	0	1	0	1	0	0	1	1	0	4
110	60	1	2	163	87	32.7449	4	1	1	1	4	2	1	2	2.5	1	0	1	0	0	5	1	1	1	20	1	18	3	14.82	2	9	1	0	0	0	0	0	0	0	0	1	1	0	0	0	0	0	2
111	67	1	2	156	62.5	25.6821	3	1	1	2	1	1	3	2	0.5	1	1	1	2	0	9	2	3	1	35	2	19	3	14.44	2	10.44	2	0	1	0	1	1	0	0	1	0	1	1	0	1	1	0	8
112	60	1	2	160	65	25.3906	3	1	1	2	2	1	1	2	6.5	1	0	1	0	0	4	1	1	1	12	1	20	3	8.71	1	7.34	1	0	0	0	0	0	0	0	0	0	0	0	0	0	0	0	0
113	63	1	2	158	85	34.049	4	1	1	2	2	1	1	2	4	1	0	1	1	0	15	3	6	2	52	3	19	3	18.25	3	15.76	3	0	0	0	1	0	1	0	1	0	1	0	0	0	1	1	6
114	62	1	2	162	60	22.8624	2	1	1	2	2	1	1	2	6.5	2	0	1	3	0	14	2	6	2	39	2	20	3	11.12	2	8.01	1	1	0	0	1	1	1	0	0	0	1	0	0	0	1	1	7
115	74	2	2	150	60	26.6667	3	1	1	2	2	1	1	2	0.5	2	1	2	1	1	6	1	4	2	17	1	13	2	12.56	2	10.78	2	1	0	1	1	0	1	1	0	1	1	1	0	0	0	0	8
116	65	1	2	155	55	22.8928	2	1	1	2	1	1	1	2	0.5	1	0	1	2	0	0	0	0	0	6	1	19	3	7.41	1	6.28	1	0	0	0	0	0	1	0	0	0	0	0	0	0	0	0	1
117	60	1	2	158	64	25.6369	3	1	1	2	3	1	1	2	16.5	2	0	1	1	1	8	2	6	2	28	2	16	3	14.5	2	9	1	0	1	0	1	1	0	0	0	0	1	0	0	0	0	1	5
118	65	1	2	160	67	26.1719	3	1	1	2	1	1	1	2	0.5	1	0	1	1	1	2	1	1	1	7	1	20	3	11.09	2	9.31	1	0	0	0	1	0	0	0	1	1	1	0	0	1	0	0	5
119	67	1	2	162	60	22.8624	2	1	1	2	2	1	1	2	4	2	1	1	1	1	17	3	2	1	31	2	15	2	14.41	2	10.78	2	0	0	1	1	0	1	0	0	1	1	0	0	0	1	0	6
120	60	1	2	158	70	28.0404	4	1	1	2	3	1	1	2	1	2	0	1	1	1	6	1	5	2	43	2	10	1	23.73	4	16.26	3	0	1	1	0	0	1	1	1	0	1	0	0	1	0	0	7
121	60	1	2	155	60	24.974	3	1	1	2	3	1	2	3	11.5	2	0	1	1	0	5	1	5	2	17	1	18	3	13.34	2	14	2	1	1	0	0	1	0	1	0	0	1	0	0	0	0	0	5
122	71	2	2	156	60	24.6548	3	1	1	2	2	2	1	1	1	2	2	1	0	1	8	2	3	1	16	1	14	2	11.77	2	7.34	1	0	0	0	0	0	0	0	0	0	1	0	0	0	0	0	1
123	60	1	2	155	72	29.9688	4	1	1	2	2	1	1	2	0.5	2	0	1	2	0	8	2	4	2	12	1	20	3	7.59	1	6.41	1	0	0	1	0	0	0	0	0	0	0	1	0	0	0	0	2
124	66	1	2	160	55	21.4844	2	1	1	2	2	1	3	2	2.5	2	0	2	1	1	10	2	4	2	35	2	11	2	13.63	2	9.9	1	0	1	0	1	1	1	0	1	1	1	0	0	0	0	0	7
125	60	1	2	157	59	23.9361	2	1	2	2	3	1	1	2	0.5	1	0	1	1	0	7	1	4	2	19	1	16	3	11.44	2	11.9	2	0	1	0	0	0	0	0	1	0	0	0	0	0	0	0	2
126	70	2	2	158	78.5	31.4453	4	1	2	2	2	1	1	2	25	2	0	1	3	0	20	3	6	2	11	1	18	3	12.82	2	9	1	0	0	0	0	0	0	0	0	0	1	0	0	0	0	0	1
127	60	1	2	162	75	28.578	4	1	1	2	2	1	1	2	11	1	0	1	1	0	10	2	3	1	25	2	13	2	9.34	1	10.98	2	0	1	0	0	0	1	0	0	0	0	0	1	0	0	0	3
128	65	1	2	154	72	30.3593	4	1	1	2	1	1	1	2	4.5	1	0	1	1	0	0	0	2	1	14	1	20	3	14.97	2	8.25	1	0	0	0	0	0	0	0	0	0	1	0	0	0	0	0	1
129	70	2	2	168	70	24.8016	3	1	1	2	3	1	5	2	0.5	2	0	1	0	1	8	2	3	1	24	2	10	1	14.94	2	8	1	0	1	0	0	0	0	0	1	1	1	0	0	0	0	0	4
130	61	1	2	156	55	22.6003	2	1	1	2	3	1	1	2	5	1	0	1	1	0	3	1	2	1	5	1	20	3	11.71	2	9.73	1	0	0	0	0	0	0	0	1	0	1	0	0	1	0	0	3
131	61	1	2	161	78	30.0914	4	1	1	2	2	1	1	3	4	1	0	1	0	0	8	2	1	1	34	2	13	2	11.78	2	9.33	1	1	0	0	1	1	1	1	0	0	1	1	0	0	0	0	7
132	60	1	2	171	72	24.623	3	1	1	2	3	1	1	2	5	2	1	1	3	0	7	1	1	1	18	1	15	2	15.76	3	14.91	2	0	1	1	1	1	0	1	0	1	0	1	0	1	1	0	9
133	65	1	2	158	70	28.0404	4	1	1	2	1	1	1	2	5	1	0	1	1	1	7	1	4	2	2	1	20	3	12.41	2	9.24	1	0	0	0	0	0	0	0	0	0	1	0	0	1	0	0	2
134	60	1	2	152	50	21.6413	2	1	1	2	1	1	2	2	3	2	0	1	1	0	3	1	2	1	5	1	19	3	11.57	2	8.65	1	0	0	0	0	1	0	1	0	0	1	0	0	0	0	0	3
135	60	1	2	163	87	32.7449	4	1	1	2	2	2	3	2	3	2	0	1	1	0	13	2	2	1	19	1	9	1	14.11	2	12.74	2	1	1	0	0	1	0	1	0	0	0	1	0	0	0	0	5
136	74	2	2	158	61	24.4352	3	1	1	2	2	1	1	2	2	2	0	2	1	1	11	2	3	1	25	2	20	3	14.23	2	10.56	2	1	0	0	0	0	1	1	0	0	0	0	0	0	1	0	4
137	63	1	2	152	56	24.2382	3	1	1	2	2	1	2	2	4	2	0	1	3	0	4	1	1	1	12	1	16	3	13.25	2	9.16	1	1	1	0	0	1	0	0	1	0	0	1	1	0	0	0	6
138	71	2	2	162	70	26.6728	3	1	1	2	2	2	2	2	0.5	1	0	1	0	0	2	1	1	1	6	1	20	3	13.02	2	9.35	1	0	0	0	0	0	0	1	0	0	1	1	0	0	0	0	3
139	83	3	1	164	80	29.7442	4	1	1	2	1	1	2	2	5	1	2	1	1	0	3	1	1	1	11	1	19	3	14.54	2	10.21	2	1	0	0	0	1	0	1	0	0	1	0	0	1	0	1	6
140	79	2	1	165	65	23.8751	2	1	1	1	4	2	3	1	1	1	0	1	1	0	3	1	2	1	9	1	20	3	12.86	2	9.87	1	0	0	0	0	0	0	1	0	0	1	0	0	0	0	0	2
141	65	1	2	162	65	24.7676	3	1	1	2	1	1	2	2	0.5	1	0	1	1	1	4	1	2	1	5	1	17	3	13.54	2	9.25	1	0	0	0	0	1	0	1	0	0	0	0	0	0	0	0	2
142	64	1	2	153	66	28.1943	4	1	1	1	4	1	3	2	5	1	1	1	2	1	5	1	6	2	22	1	18	3	12.57	2	10.03	2	1	1	0	0	1	1	1	0	0	1	1	0	0	0	0	7
143	71	2	2	158	50	20.0288	2	1	1	1	4	1	5	2	2	1	1	1	1	0	8	2	1	1	24	2	16	3	12.08	2	11.81	2	0	1	0	0	0	0	0	0	1	0	1	0	1	1	0	5
144	73	2	2	157	45	18.2563	1	1	1	1	2	1	4	1	9.5	1	2	1	0	0	8	2	3	1	33	2	18	3	22.03	4	12.9	2	0	1	0	0	0	1	0	0	1	0	0	1	0	0	0	4
145	83	3	2	155	60	24.974	3	1	1	1	1	1	1	3	0.5	1	1	1	1	0	5	1	1	1	17	1	15	2	17.14	3	18.98	3	0	1	0	0	1	0	0	0	1	1	0	0	0	1	1	6
146	60	1	2	160	60	23.4375	2	1	1	1	4	1	5	1	2.5	1	0	1	0	0	2	1	0	0	16	1	20	3	11.94	2	11.67	2	1	0	0	0	0	0	1	0	1	0	1	0	0	0	0	4
147	66	1	2	164	49	18.2183	1	1	2	1	4	1	5	2	6.5	2	0	1	2	1	5	1	2	1	13	1	17	3	10.37	2	9.33	1	0	0	0	0	0	0	0	0	0	0	0	0	0	0	0	0
148	64	1	2	160	60	23.4375	2	1	1	2	2	2	2	2	1	1	0	1	3	1	8	2	1	1	34	2	13	2	11.78	2	9.33	1	0	0	0	1	0	1	0	0	0	1	0	0	0	0	0	3
149	60	1	2	160	82.5	32.2266	4	1	1	2	2	1	2	2	1	2	2	1	1	1	8	2	6	2	26	2	16	3	10.97	2	18.07	3	1	1	0	0	1	0	0	1	1	1	0	0	0	0	0	6
150	70	2	1	168	64	22.6757	2	1	1	2	3	2	1	2	2.5	2	0	1	1	0	5	1	0	0	4	1	20	3	9.45	1	8.66	1	0	0	0	0	0	1	0	0	0	1	1	0	0	0	0	3
151	77	2	2	157	58	23.5304	2	1	2	2	1	2	2	2	4.5	2	0	1	1	0	8	2	4	2	33	2	20	3	13.94	2	14.01	2	0	0	0	0	0	0	0	0	0	1	0	0	0	0	1	2
152	62	1	1	182	79	23.8498	2	1	1	2	2	2	1	2	0.5	1	0	1	2	0	2	1	1	1	11	1	20	3	12.4	2	9.77	1	0	0	0	0	1	0	0	0	0	0	0	0	0	0	0	1
153	61	1	2	145	64	30.44	4	1	1	2	3	2	2	2	1	2	0	1	1	1	3	1	4	2	4	1	20	3	11.1	2	9.76	1	0	0	0	0	0	0	0	0	1	0	0	0	0	0	0	1
154	60	1	2	163	85	31.9922	4	1	1	2	2	2	2	2	0.5	1	1	1	2	0	13	2	6	2	42	2	9	1	14.11	2	20.74	4	0	1	0	0	1	1	0	0	1	1	1	0	0	1	0	7
155	61	1	2	169	68	23.8087	2	1	1	2	1	2	3	2	5	1	0	1	1	0	5	1	1	1	21	1	20	3	11.37	2	8.53	1	0	1	0	0	0	0	0	0	1	0	0	0	0	0	0	2
156	60	1	2	151	65	28.5075	4	1	1	1	4	1	3	2	16	2	1	1	1	0	3	1	0	0	10	1	20	3	10	2	6.59	1	0	1	0	0	0	0	0	0	1	0	0	0	0	0	0	2
157	79	2	1	171	76	25.9909	3	1	1	1	4	1	4	1	4	1	0	1	3	0	4	1	0	0	11	1	20	3	11.59	2	7.22	1	0	1	0	0	0	0	0	0	0	0	0	0	0	0	0	1
158	72	2	2	159	67.5	26.6999	3	1	1	1	3	1	3	1	4	1	0	1	3	0	3	1	0	0	9	1	20	3	12.8	2	7.1	1	0	1	0	0	0	0	0	0	1	0	0	0	0	0	0	2
159	88	3	2	150	52	23.1111	2	1	2	1	2	1	3	1	34	1	2	2	1	0	11	2	6	2	21	1	14	2	26.03	5	20.9	4	1	1	1	0	1	1	1	1	1	0	1	0	1	1	0	11
160	60	1	2	162	60	22.8624	2	1	1	1	4	1	3	2	1	1	0	1	1	0	4	1	2	1	16	1	20	3	9.51	1	7.03	1	0	0	0	0	0	0	0	0	0	0	0	0	0	0	0	0
161	60	1	2	161	61	23.533	2	1	1	1	4	1	3	1	1	1	0	1	0	0	11	2	1	1	40	2	20	3	8.72	1	8.58	1	0	1	0	0	0	0	0	0	1	0	1	0	0	0	0	3
162	60	1	2	160	46	17.9687	1	1	1	1	3	1	3	1	4	2	0	1	1	0	4	1	2	1	16	1	20	3	9.34	1	6.32	1	0	0	0	0	0	0	0	0	1	0	1	0	0	0	0	2
163	69	1	2	162	70	26.6728	3	1	2	1	1	1	3	1	1.5	2	0	1	0	1	13	2	2	1	46	2	18	3	15.4	3	12.07	2	0	1	1	1	0	0	0	0	0	1	1	0	0	1	0	6
164	64	1	1	174	61	20.148	2	1	1	1	3	2	2	2	1	2	0	1	1	0	4	1	2	1	13	1	18	3	14.03	2	11.07	2	0	0	0	0	0	0	0	0	1	0	0	0	0	0	0	1
165	85	3	2	153	60	25.6312	3	1	2	1	2	1	2	1	20	2	2	1	3	0	11	2	4	2	28	2	10	1	18.72	3	17.29	3	1	1	0	0	1	1	1	0	1	0	1	0	1	1	0	9
166	61	1	2	163	48	18.0662	1	1	1	1	4	1	2	1	1	1	0	1	1	0	5	1	0	0	18	1	17	3	11.65	2	8.59	1	0	0	0	0	0	0	0	0	1	0	0	0	0	0	0	1
167	77	2	2	163	58	21.83	2	1	1	1	3	1	2	1	6	2	0	1	3	1	4	1	2	1	18	1	19	3	13.72	2	11.2	2	0	1	0	0	1	0	0	0	1	1	1	0	0	0	1	6
168	65	1	2	163	64	24.0882	3	2	1	1	4	1	3	2	6.5	1	0	1	0	0	6	1	1	1	17	1	17	3	13.08	2	11.77	2	0	0	0	0	1	0	0	0	1	1	0	0	0	0	0	3
169	77	2	2	159	60	23.7332	2	1	1	1	2	2	3	1	2	2	0	1	2	0	3	1	2	1	11	1	19	3	14.07	2	10.78	2	0	1	0	0	0	0	0	0	1	0	0	0	0	0	0	2
170	60	1	1	178	74	23.3556	2	1	2	1	2	2	3	2	1	1	0	1	0	0	5	1	0	0	20	1	18	3	11.72	2	9.07	1	0	0	0	0	0	0	0	0	1	0	0	0	0	0	0	1
171	60	1	2	158	51	20.4294	2	1	1	1	3	1	3	2	1	2	0	1	0	1	4	1	0	0	6	1	18	3	10.94	2	9.34	1	0	0	0	0	0	0	0	0	1	0	0	0	0	0	0	1
172	74	2	2	155	49	20.3954	2	1	2	1	2	1	1	2	21	2	2	1	3	0	9	2	3	1	33	2	15	2	16.03	3	12.78	2	0	1	0	0	0	0	0	0	1	0	0	0	0	1	0	3
173	81	3	2	151	60	26.3146	3	1	2	1	3	1	2	1	8.5	2	1	1	2	0	9	2	3	1	35	2	18	3	16.76	3	14.67	2	0	1	0	0	1	1	0	0	1	1	0	0	0	0	0	5
174	88	3	2	165	100	36.7309	4	1	2	1	1	1	2	2	1	2	1	2	1	0	8	2	1	1	20	1	14	2	21.78	4	20.52	4	1	1	0	0	1	1	1	0	1	1	1	1	1	1	0	11
175	63	1	2	165	64	23.5078	2	1	1	1	4	1	3	2	4.5	2	0	1	2	0	11	2	1	1	42	2	19	3	14.4	2	12.03	2	0	1	0	0	1	0	0	0	0	0	0	0	0	0	0	2
176	74	2	2	157	52.5	21.299	2	1	1	1	3	1	1	2	3	1	0	1	1	0	3	1	1	1	15	1	20	3	12.03	2	8.91	1	0	1	0	0	1	0	0	0	1	0	1	0	0	0	0	4
177	80	3	1	175	75	24.4898	3	1	2	1	2	1	2	2	4.5	2	1	1	2	1	9	2	2	1	29	2	13	2	15.01	3	12.21	2	0	1	0	0	0	0	0	0	1	1	0	0	0	1	0	4
178	78	2	2	150	55	24.4444	3	1	2	1	2	1	2	2	1	2	0	1	2	0	6	1	1	1	24	2	14	2	14.41	2	11.06	2	0	1	0	0	1	1	0	1	1	1	1	0	0	0	0	7
179	79	2	2	150	65	28.8889	4	1	1	1	4	1	3	1	14	2	1	1	2	0	6	1	3	1	22	1	17	3	18.01	3	14.78	2	0	1	0	0	1	1	0	0	1	1	0	0	0	0	0	5
180	81	3	2	152	56	24.2382	3	1	1	1	4	1	5	1	4.5	2	1	1	1	0	7	1	0	0	9	1	19	3	14.37	2	11.78	2	0	1	0	0	0	1	0	0	1	0	0	0	0	0	0	3
181	78	2	1	173	73	24.3911	3	1	1	1	4	1	5	1	1	1	0	1	1	0	2	1	0	0	7	1	20	3	12.07	2	7.57	1	0	1	0	0	0	0	0	0	1	0	1	0	0	0	0	3
182	73	2	2	155	110	45.7856	4	1	1	1	2	1	2	2	3	1	2	1	3	0	16	3	4	2	47	3	12	2	21.63	4	28.89	5	1	1	1	1	1	1	1	1	1	0	1	1	1	1	0	13
183	77	2	2	160	64	25	3	1	1	1	3	1	2	1	4	2	1	1	2	0	7	1	2	1	36	2	17	3	14.72	2	13.22	2	0	1	0	0	0	0	0	0	1	0	0	0	0	0	0	2
184	77	2	2	160	53	20.7031	2	1	1	1	4	1	3	2	6	1	0	1	1	0	3	1	0	0	9	1	19	3	9.94	1	8.34	1	0	1	0	0	0	0	0	0	1	0	1	0	0	0	0	3
185	79	2	2	158	65	26.0375	3	1	1	1	4	1	3	1	5	2	0	1	3	1	4	1	1	1	12	1	20	3	14.85	2	11.38	2	0	1	0	0	1	0	1	0	1	1	1	0	0	0	0	6
186	81	3	1	166	70	25.4028	3	1	2	1	4	1	5	1	1	2	1	1	3	0	3	1	0	0	11	1	18	3	12.25	2	9.37	1	0	1	0	0	0	0	0	0	0	0	0	0	0	0	0	1
187	60	1	1	176	64	20.6612	2	1	1	1	4	1	5	1	3.5	1	0	1	0	0	1	1	1	1	8	1	18	3	9.09	1	7.03	1	0	1	0	0	0	0	0	0	0	0	0	0	0	0	0	1
188	71	2	2	158	80	32.0461	4	1	1	1	2	2	2	2	5.5	2	1	1	2	0	2	1	3	1	36	2	19	3	18.72	3	11.72	2	1	1	1	1	1	1	1	0	1	1	1	1	0	0	1	12
189	74	2	1	165	60	22.0386	2	1	1	1	4	2	3	1	5	1	0	1	2	1	2	1	2	1	12	1	20	3	7.32	1	7.6	1	1	0	0	0	1	0	1	0	0	0	1	0	0	0	0	4
190	60	1	2	158	62	24.8358	3	1	1	1	3	2	5	1	1.5	2	0	1	2	1	3	1	0	0	2	1	20	3	8.25	1	8.67	1	1	0	0	0	1	0	0	0	0	0	1	0	0	0	0	3
191	74	2	2	148	55	25.1096	3	1	1	1	3	2	5	2	0.5	1	1	1	1	1	6	1	2	1	25	2	18	3	10.22	2	8	1	1	0	0	1	1	0	1	0	1	1	0	0	0	0	0	6
192	77	2	2	158	70	28.0404	4	1	2	1	4	2	2	1	3.5	2	2	1	1	1	6	1	2	1	34	2	18	3	10.28	2	15.16	3	1	0	0	1	1	0	1	0	0	1	1	0	0	1	1	8
193	60	1	2	157	68	27.5873	3	1	2	1	4	2	3	2	0.5	1	1	1	1	1	1	1	0	0	0	0	20	3	5.12	1	5.84	1	1	0	0	0	1	0	1	0	0	0	1	0	0	0	0	4
194	73	2	2	153	73	31.1846	4	1	1	1	3	2	3	2	0.5	1	2	2	3	0	11	2	7	3	47	3	15	2	18	3	15	3	1	1	0	1	1	0	1	1	0	0	1	1	1	1	1	11
195	66	1	2	155	60	24.974	3	1	1	1	3	2	2	2	2	1	0	1	1	0	10	2	2	1	32	2	20	3	12.1	2	16.97	3	1	0	1	0	1	1	1	0	0	1	1	0	0	0	1	8
196	71	2	1	165	58	21.3039	2	1	1	1	2	2	5	2	2.5	2	0	1	0	0	0	0	0	0	0	0	20	3	8.1	1	8.66	1	1	0	0	0	1	0	1	0	0	0	1	0	0	0	0	4
197	64	1	2	156	75	30.8185	4	1	1	1	3	2	2	2	8	2	0	1	2	1	8	2	0	0	19	1	18	3	10.29	2	11.65	2	1	1	1	0	1	1	1	0	0	0	1	0	0	0	0	7
198	80	3	2	150	60	26.6667	3	2	1	1	3	1	2	2	0.5	2	1	1	3	0	9	2	1	1	30	2	13	2	15.16	3	17.06	3	1	1	0	0	1	0	1	0	0	1	1	0	0	1	0	7
199	79	2	1	172	69	23.3234	2	1	1	1	3	2	2	2	0.5	1	1	1	1	1	3	1	1	1	31	2	12	2	17.67	3	10.91	2	1	1	1	1	1	1	1	0	1	0	1	1	0	1	1	12
200	74	2	1	169	66	23.1084	2	1	1	1	3	2	3	2	14.5	1	0	1	3	0	3	1	0	0	14	1	17	3	13.17	2	13.09	2	0	1	0	0	0	0	0	0	0	0	0	0	1	1	1	4
201	67	1	2	159	54	21.3599	2	1	1	1	4	2	4	1	1.5	2	0	1	2	0	2	1	2	1	9	1	19	3	9.17	1	8.57	1	1	0	0	0	1	0	1	0	0	0	1	0	0	0	0	4
202	68	1	2	159	62	24.5243	3	1	1	1	4	2	2	2	0.5	1	0	1	1	0	8	2	5	2	25	2	14	2	11.44	2	11.9	2	1	1	1	0	0	0	1	1	1	0	0	0	0	1	0	7
203	63	1	2	160	75	29.2969	4	1	1	2	2	1	1	2	16.5	2	0	1	1	1	1	1	0	0	2	1	20	3	11.42	2	7.38	1	1	0	0	0	1	1	1	0	0	1	1	0	1	0	0	7
204	68	1	2	160	77	30.0781	4	1	1	2	1	1	1	2	4	2	1	1	1	1	9	2	4	2	48	3	16	3	15.51	3	18.97	3	1	1	1	1	1	0	1	0	1	1	1	1	0	1	0	11
205	65	1	2	162	70	26.6728	3	1	1	1	3	2	1	2	2.5	1	0	1	2	0	1	1	0	0	6	1	20	3	7.75	1	5.73	1	1	0	0	0	1	0	1	0	0	1	1	0	0	0	1	6
206	65	1	1	157	65	26.3702	3	1	1	2	2	1	1	2	2.5	2	2	1	1	1	7	1	3	1	27	2	16	3	14.35	2	12.17	2	1	1	0	0	1	0	1	0	0	1	1	1	1	0	0	8
207	60	1	2	156	51	20.9566	2	1	1	2	3	2	2	2	1	2	0	1	1	1	1	1	0	0	5	1	17	3	6.94	1	6.59	1	1	0	0	0	1	0	1	0	0	1	1	0	0	0	0	5
208	64	1	2	156	77	31.6404	4	1	1	2	2	2	4	2	10	2	0	1	3	0	6	1	3	1	12	1	20	3	7.91	1	6	1	1	1	0	0	1	1	1	0	0	0	1	0	0	0	0	6
209	60	1	1	167	60	21.5139	2	1	1	2	1	1	5	3	9.5	2	0	1	3	1	11	2	6	2	27	2	16	3	10.1	2	7	1	1	1	0	0	1	0	1	0	1	1	1	0	0	0	0	7
210	64	1	2	160	62	24.2187	3	1	2	2	1	1	1	2	2.5	2	0	1	3	1	10	2	7	3	35	2	15	2	11.6	2	10	2	1	0	1	1	1	0	1	0	0	1	1	1	0	1	0	9
211	70	2	1	170	68	23.5294	2	1	1	1	2	2	4	2	6	2	0	1	1	0	4	1	2	1	6	1	20	3	10.97	2	14.07	2	1	0	0	0	1	0	1	0	0	0	1	0	1	1	0	6
212	79	2	2	163	74	27.852	3	1	1	2	1	1	1	3	8	2	1	1	1	1	7	1	3	1	47	3	14	2	15.3	3	18.25	3	1	1	1	0	0	1	1	1	1	1	1	0	0	1	1	11
213	60	1	2	171	65	22.2291	2	1	1	2	1	2	2	2	13	2	0	1	1	0	3	1	0	0	2	1	20	3	10.23	2	10	2	0	0	0	0	0	0	0	0	0	1	0	0	0	0	0	1
214	67	1	1	165	80	29.3848	4	1	1	2	2	1	1	2	4	2	1	1	1	0	6	1	4	2	24	2	17	3	12.5	2	16.77	3	0	1	1	0	0	0	0	0	1	1	1	1	1	1	1	9
